# Supplementary material for: Distinct gene expression and secondary metabolite profiles in suppressor of prosystemin-mediated responses2 (spr2) tomato mutants having impaired mycorrhizal colonization
Source: PeerJ. 2020 Apr 16;8:e8888. doi: 10.7717/peerj.8888 (PMC7167247; doi:10.7717/peerj.8888)
Supplement: Supplemental Information 3 — The effect on growth, measured as differences in plant height, and in photosynthesis-related parameters, defined in terms of chlorophyll content and chlorophyll fluorescence emission, were determined at four different days post inoculation (dpi) in non-colonized (WT and spr2) and in mycorrhizal (WT-M and spr2-M) plants1. [file peerj-08-8888-s003.docx]

|  | **15 dpi** | **23 dpi** | **30 dpi** | **37 dpi** |
| --- | --- | --- | --- | --- |
|  | **Plant height (cm)** | | | |
| **WT** | 8.03 ± 0.79a | 11.14 ± 0.89b | 12.77 ± 0.83b | 15.20 ± 1.62ab |
| **WT-M** | 8.18 ± 0.82a | 13.09 ± 1.25a | 14.85 ± 1.41a | 17.70 ± 2.31ab |
| ***spr2*** | 4.69 ± 0.77b | 8.36 ± 0.75c | 9.56 ± 1.45c | 13.61 ± 3.12b |
| ***spr2*-M** | 5.11 ± 0.53b | 7.54 ± 0.98c | 9.13 ± 1.12c | 12.65 ± 1.37b |
|  | **Chlorophyll content** | | | |
| **WT** | ND | 34.20 ± 3.13a | 43.82 ± 5.28b | 59.57 ± 4.91a |
| **WT-M** | ND | 25.88 ± 2.09b | 47.00 ± 6.17a | 49.45 ± 4.53bc |
| ***spr2*** | ND | 20.70 ± 4.32c | 25.37 ± 8.66c | 40.31 ± 11.76c |
| ***spr2*-M** | ND | 25.38 ± 3.69b | 38.74 ± 7.76b | 50.07 ± 9.92b |
|  | **Chlorophyll fluorescence** | | | |
|  | **Fv/ Fw** | | | |
| **WT** | ND | 0.82 ± 0.005b | ND | 0.80 ± 0.023b |
| **WT-M** | ND | 0.82 ± 0.000b | ND | 0.81 ± 0.008ab |
| ***spr2*** | ND | 0.84 ± 0.005a | ND | 0.83 ± 0.024ab |
| ***spr2*-M** | ND | 0.83 ± 0.012a | ND | 0.84 ± 0.005b |
|  | **PIabs** | | | |
| **WT** | ND | 4.28 ± 0.43a | 4.18 ± 0.48b | 3.87 ± 0.51b |
| **WT-M** | ND | 3.78 ± 0.21a | 4.89 ± 0.56ab | 4.04 ± 0.60b |
| ***spr2*** | ND | 4.03 ± 0.96a | 5.27 ± 0.88ab | 5.86 ± 0.65a |
| ***spr2*-M** | ND | 4.67 ± 0.61a | 5.89 ± 1.39a | 6.35 ± 0.31a |

1Data were compiled from plants corresponding to the E2 experiment in which colonization efficiency in roots inoculated with a six AMF species consortium, was determined 45 dpi.
